# Supplementary material
Source: Springer Nature journal article supplement (https://www.springermedizin.de/resource/supplementary/12885_2014_4636_MOESM12_ESM.pdf/9466914)

**A**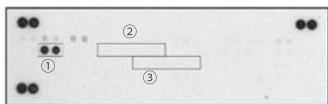

①HGFR/c-MET

②PDGFR

③VEGFR

**B**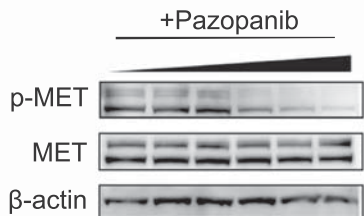**C**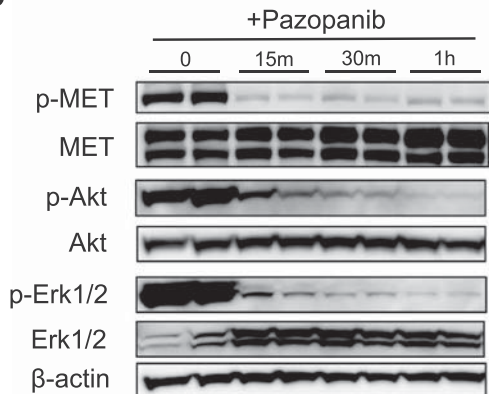**D**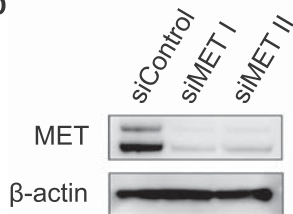**E**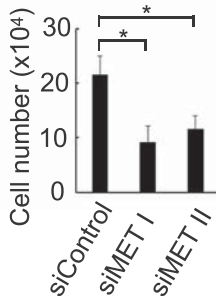

Supplement: MOESM12 [file 9466914]
